# Supplementary material for: Breast Milk Microbiota Is Shaped by Mode of Delivery and Intrapartum Antibiotic Exposure
Source: PubMed Central journal article supplement (PMC6369203; doi:10.3389/fnut.2019.00004), 2019-02-04
Supplement: Image-1.pdf [file Image-1.pdf]

Supplementary Figure 1A

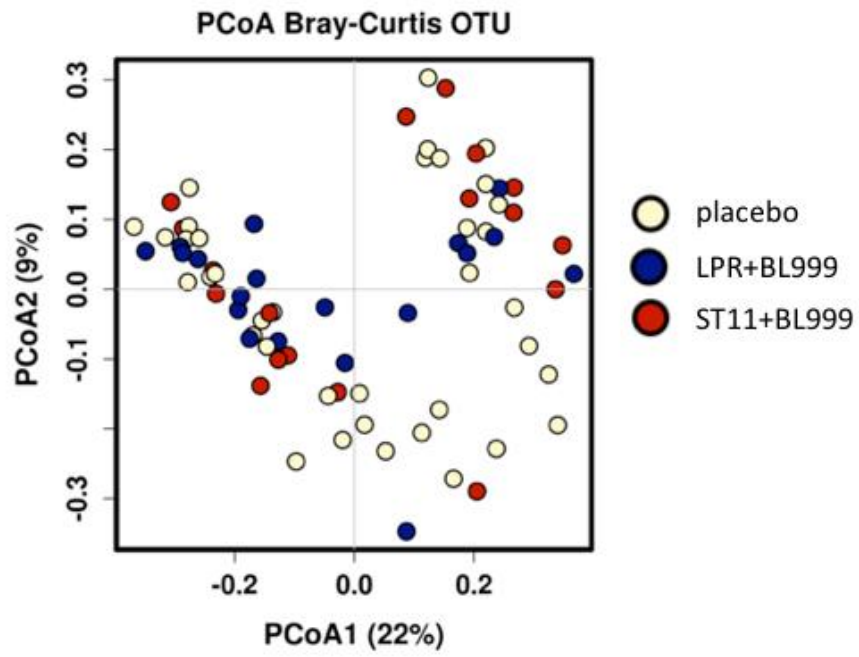

Supplementary Figure 1B

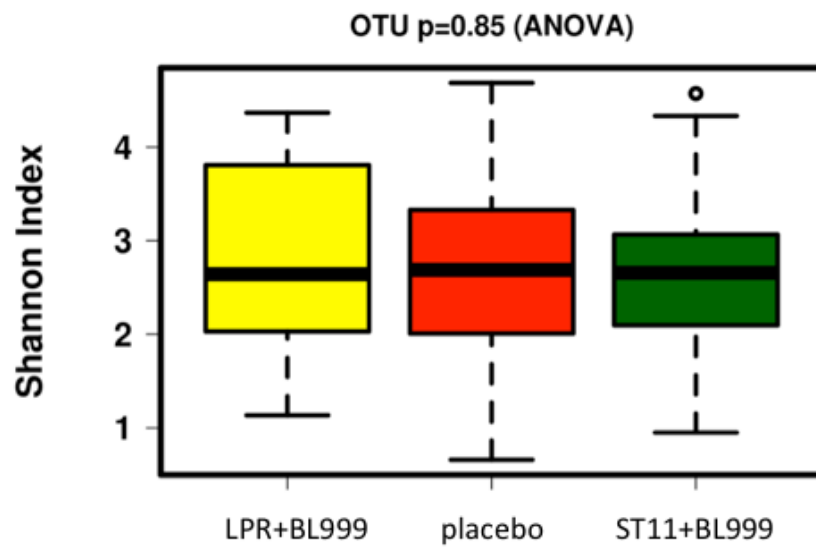

Supplementary Figure 1C

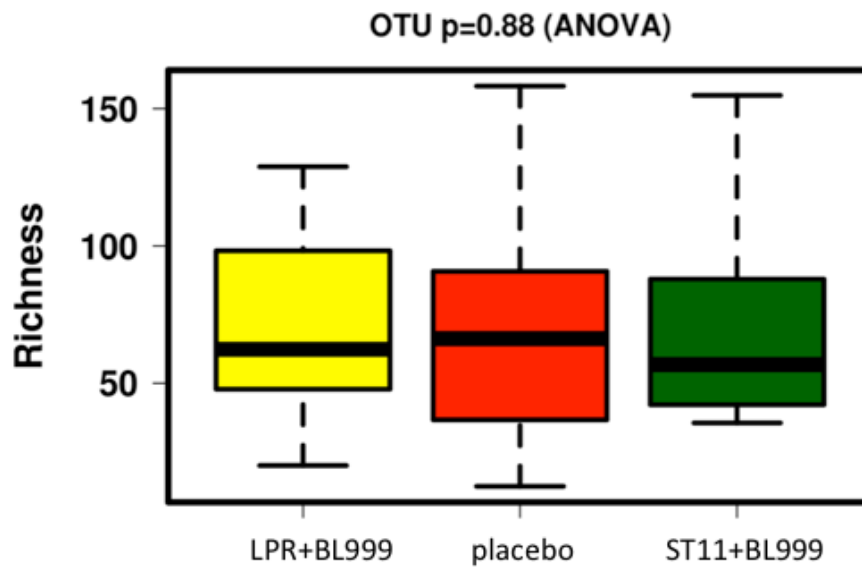

**Supplementary Figure 1.** Maternal probiotic supplementation with either the combination of *Lactobacillus rhamnosus* LPR and *Bifidobacterium longum* BL999 (LPR+BL999) or the combination of *Lactobacillus paracasei* ST11 and *Bifidobacterium longum* BL999 (ST11+BL999) was not associated with significant changes in the breast milk microbiota 1 month after delivery as compared to placebo. No clustering based on the intervention was detected by PCoA (ANOSIM  $p=0.96$ ) (A), nor were there statistically significant differences in breast milk microbiota alpha diversity as assessed by the Shannon index (B) or in microbiota richness (C).
